# Supplementary material
Source: publisher figshare collection journal article supplement (https://sage.figshare.com/ndownloader/files/12442733)
Supplement: Supplementary file 1 [file 12442733]

**Supplementary Table 1.** 47 papers were included in this study, consisting of 807 patients. Class II evidence was available in 3 papers, Class III in 3 papers, Class IV in 15 papers, and Class V in 26 papers.

| Author                 | Study Design and Class of Evidence       | Demographics                                                                                                                                                                                               | Inclusion Criteria                                                                                                                                   | Location                                                                                                | Treatment                                                                                                                                                                                          | Primary Endpoints/Results                                                                                                                                                                                                        |
|------------------------|------------------------------------------|------------------------------------------------------------------------------------------------------------------------------------------------------------------------------------------------------------|------------------------------------------------------------------------------------------------------------------------------------------------------|---------------------------------------------------------------------------------------------------------|----------------------------------------------------------------------------------------------------------------------------------------------------------------------------------------------------|----------------------------------------------------------------------------------------------------------------------------------------------------------------------------------------------------------------------------------|
| Han et al. (2015)      | Retrospective Review<br><i>Level IV</i>  | N=30<br>Gender=83.3% (25/30) Male                                                                                                                                                                          | Inclusion: All patients presented with epidural compression from clear cell renal cell carcinoma (CCRCC). Pain was the most common reported symptom. | Cervical: 13<br>Thoracic: 6<br>Lumbar: 15<br>Sacrum: 5                                                  | All patients had surgery for decompression and surgical excision. A total of 35 procedures were performed.<br><br>Pre-operative embolization in 17/30 patients                                     | <u>Mean survival (N=30)</u><br>17 months (12-32)                                                                                                                                                                                 |
| Petteys et al. (2015)  | Retrospective Review<br><i>Level IV</i>  | N=30<br>Gender: 23/30 (76.7%) male.<br>Mean age: 57.6 years (29-76).<br><br>KPS<br>80-100: N=20<br>50-70: N=5<br>10-40: N=5<br><br>Significant pain in 21/30 (70%)<br>Neurologic Dysfunction in 9/30 (30%) | Inclusion: 30 patients with metastatic RCC treated with surgery from January 2000-December 2011 were included in this study                          | Not stated                                                                                              | 30 patients underwent a total of 40 spine operations.<br><br><u>Pre-op RT</u><br>15 (50%)<br><u>Pre-op chemo/immunotherapy</u><br>12 (40%)<br><u>Pre-op transarterial embolization</u><br>24 (80%) | <u>Median survival (n):</u><br>Median overall survival (30)=11.4 months.<br><br><u>Survival by Tokuhashi score (n)</u><br>12-15 (15)= 32.9 months.<br>9-11 (7)= 11.7 months.<br>0-8 (8): 5.4 months.                             |
| Sellin et al. (2015)   | Retrospective Review<br><i>Level IV</i>  | N=37<br>Median age=37 years<br>Gender=75.7% (28/37) male.<br>Median age=62.2 years<br><br>Of 37 patients 32 had no neurologic deficit prior to SRS.                                                        | Inclusion: 37 patients with metastatic RCC to the spine were treated with stereotactic radiosurgery (SRS) from 2005-2012.                            | Cervical=2<br>Thoracic=13<br>Lumbosacral=22                                                             | 37 patients were treated with SRS for 40 sites of metastasis.<br><br>5 patients went on to receive surgery.                                                                                        | <u>Median overall survival (N=37):</u><br>16.3 months (7.4-25.3).<br><br><u>Median survival by presence/absence of neurologic deficit</u><br>Pre-op neurologic deficit (N=5): 7.4 months<br>No pre-op neuro deficit (N=32): 22.1 |
| Thibault et al. (2014) | Prospective Study<br><i>Level II</i>     | N=37<br>Median Age=63 years (33-82)<br>Gender=67.6% (25/37) male.                                                                                                                                          | Inclusion: 37 patients with metastatic RCC to the spine were treated.<br><br>Exclusion: 37 patients had RCC involvement in 71 vertebral segments.    | 71 segments in 37 patients:<br><br>Cervical: 9<br>Thoracic: 33<br>Lumbar: 21<br>Sacral: 8               | All patients were treated with stereotactic body radiotherapy (SBRT). 17/71 segments underwent surgery before SBRT, 10/71 underwent surgery following SBRT.                                        | <u>Median overall survival (N=37)</u><br>26.6 months (0.4-189)<br><br>1-year overall survival: 64%<br>1-year local control (LC)=83%                                                                                              |
| Bakker et al. (2014)   | Retrospective Review<br><i>Level IV</i>  | N=21                                                                                                                                                                                                       | Inclusion: 21 patients presented with epidural metastases due to RCC from 2006-2012.                                                                 | 20/21 had metastases in the thoracic or lumbar spine.<br><br>Location for remaining patient not stated. | All 21 patients were treated with pre-operative embolization and intralesional tumor resection.                                                                                                    | <u>Median survival:</u><br><ul style="list-style-type: none"> <li>• Motzer favorable risk: 25 months (11-75)</li> <li>• Motzer intermediate risk: 6 months (1-25)</li> <li>• Motzer poor risk: 2 months (2-4)</li> </ul>         |
| Sohn et al. (2014)     | Retrospective Review<br><i>Level III</i> | N=26 (13 SRS, 13 RT)                                                                                                                                                                                       | Inclusion: 26 patients with metastatic RCC to the spine.                                                                                             | <u>SRS</u><br>Cervical=3<br>Thoracic=10<br>Lumbar=4<br>Sacral=0                                         | 13 patients were treated with SRS, consisting of Novalis shaped beam radiosurgical unit or Cyberknife. The other                                                                                   | <u>Median survival:</u><br>RT (N=13): 7 months<br>SRS (N=13): 15 months                                                                                                                                                          |

|                           |                                                |                                                                                                                                                         |                                                                                                                                                                 |                                                                    |                                                                                                                                                                            |                                                                                                                                                                                                                                                                                                           |
|---------------------------|------------------------------------------------|---------------------------------------------------------------------------------------------------------------------------------------------------------|-----------------------------------------------------------------------------------------------------------------------------------------------------------------|--------------------------------------------------------------------|----------------------------------------------------------------------------------------------------------------------------------------------------------------------------|-----------------------------------------------------------------------------------------------------------------------------------------------------------------------------------------------------------------------------------------------------------------------------------------------------------|
|                           |                                                |                                                                                                                                                         |                                                                                                                                                                 | RT<br>Cervical=1<br>Thoracic=6<br>Lumbar=10<br>Sacral=3            | 13 patients were treated with RT.                                                                                                                                          |                                                                                                                                                                                                                                                                                                           |
| Tatsui et al. (2014)      | Retrospective Review<br><i>Level IV</i>        | N=267<br>Median age: 58 years<br>Gender: 206/207 (77.2%) Male                                                                                           | Inclusion: 267 patients with metastatic RCC to the spine.<br><br>Exclusion: Demographics reported by number of treatments, not individual patients.             | Cervical=29<br>Thoracic=177<br>Lumbar=88<br>Sacral=19              | 108 patients had immunotherapy/chemotherapy prior to spine surgery.<br><br>99 patients had RT prior to spine surgery.<br><br>All patients had surgery for spine metastases | <u>Median overall survival (N=267)</u><br>11.3 months<br><br><u>Survival By Fuhrman Grade</u><br>Grade 3 or less: 14.3 months<br>Grade 4: 6.1 months<br>Pre-operative<br><br><u>Survival by preoperative neurologic deficit</u><br>Neurologic deficit: 5.9 months<br>No pre-op neuro deficit: 13.5 months |
| Balagamwala et al. (2012) | Retrospective Review<br><i>Level IV</i>        | N=57 patients undergoing 88 treatments<br>Median age=57.5 (41-88)<br>Gender= 72/88 male (for 88 treatments)<br>Median KPS=80 (50-100)                   | Inclusion: 57 patients with metastatic RCC to the spine were treated.<br><br>Exclusion: Demographics reported by number of treatments, not individual patients. | Not Stated                                                         | All 57 patients received SBRT for RCC spine metastases for a total of 88 treatments.<br><br>24/88 spine segments had prior surgery                                         | <u>Median overall survival (N=57)</u><br>8.3 months (1.5-38)                                                                                                                                                                                                                                              |
| Gerszten et al. (2007)    | Prospective Study<br><i>Level II</i>           | N=48 patients with 60 metastatic lesions.<br>Mean age: 62 years (45-84)<br>Gender= 28/48 (58.3%)                                                        | Inclusion: 48 patients with 60 metastatic RCC lesions to the spine were treated.<br><br>Exclusion: Survival not reported                                        | 60 lesions:<br>Cervical=6<br>Thoracic=26<br>Lumbar=18<br>Sacral=10 | All 48 patients were treated with SRS.<br><br>42/60 lesions had previous EBRT.<br><br>4 patients underwent further open decompressive surgery.                             | Of patients with pre-operative pain, 89.5% (34/38) improved long-term.<br><br>Of patients with pre-op neuro deficit, 0% (0/2) improved.                                                                                                                                                                   |
| Nguyen et al. (2010).     | Prospective Study<br><i>Level II</i>           | N=48 patients with 55 lesions<br>Median age=63 (41-88) years.<br>Gender=75% (36/38) male<br>KPS 100=1<br>KPS 90=12<br>KPS 80=23<br>KPS 70=9<br>KPS 60=3 | Inclusion: 48 patients with 55 metastatic RCC lesions to the spine were treated.                                                                                | 55 lesions:<br>Cervical=6<br>Thoracic=26<br>Lumbar=23              | All 48 patients were treated with SBRT.<br><br>26/48 had previous RT<br><br>28/48 had previous spine surgery                                                               | <u>Median overall survival (N=48)</u><br>22 months<br><br>38% (14/37) of patients with pre-existing pain had long-term improvement in pain.                                                                                                                                                               |
| Quraishi et al. (2013)    | Retrospective Cohort Study<br><i>Level III</i> | N=25<br>Gender=68% (17/25) male.                                                                                                                        | Inclusion: All patients had metastatic RCC to the spine. 17/25 presented with pain and neurologic dysfunction.                                                  | Cervical=2<br>Thoracic=21<br>Lumbar=2                              | Pre-operative embolization and surgical intervention performed for all 25 patients.                                                                                        | <u>Mean overall survival</u><br>14.1 months                                                                                                                                                                                                                                                               |
| Donnelly et al. (2015)    | Case Report<br><i>Level V</i>                  | N=1, Male<br>59 years-old                                                                                                                               | Inclusion: patient with severe progressive low back pain due to compression fracture and focal kyphosis at L1                                                   | L1                                                                 | Pre-operative embolization with surgical excision.                                                                                                                         | Survival not stated.<br>Disease metastasized to the brain, requiring SRS.                                                                                                                                                                                                                                 |
| Taylor et al. (2015)      | Case Series<br><i>Level IV</i>                 | N=2 (1 RCC, 1 melanoma)<br><br>Age: 57 years<br>Gender: Female                                                                                          | Inclusion: Patient with epidural involvement of RCC.<br><br>Exclusion: Patient with melanoma.                                                                   | C1                                                                 | Surgical intervention with post-operative SRS to C1                                                                                                                        | Improvement of symptoms with local tumor control.<br>Survival not stated.                                                                                                                                                                                                                                 |
| Wasserman et al.          | Case Report                                    | N=1<br>Age=67 years                                                                                                                                     | Inclusion: Patient with known metastatic RCC                                                                                                                    | T5-6 foramen and T5 DRG                                            | Surgical intervention                                                                                                                                                      | Time from primary to metastasis was 54 months.                                                                                                                                                                                                                                                            |

|                           |                         |                                                                                        |                                                                                                                                                                                                       |                                       |                                                                               |                                                                                                                               |
|---------------------------|-------------------------|----------------------------------------------------------------------------------------|-------------------------------------------------------------------------------------------------------------------------------------------------------------------------------------------------------|---------------------------------------|-------------------------------------------------------------------------------|-------------------------------------------------------------------------------------------------------------------------------|
| (2015)                    | Level V                 | Gender=Female                                                                          |                                                                                                                                                                                                       |                                       |                                                                               | Survival not stated.                                                                                                          |
| Reddy et al. (2015)       | Case Report<br>Level V  | N=1, Male<br>Age: 66 years                                                             | Inclusion: 11 years following diagnosis of primary RCC, patient presented with back pain due to T-spine metastasis                                                                                    | T12                                   | Radiation followed by surgery due to progression of symptoms                  | <u>Survival from diagnosis of metastatic spine disease</u><br>38 months                                                       |
| Dessauvague et al. (2015) | Case Series<br>Level IV | N=2<br>Gender:<br>1. 1 Male<br>2. 1 Female<br>(Mother of #1)<br>Age:<br>1. 28<br>2. 54 | Inclusion: Both patients had VHL syndrome with metastatic RCC                                                                                                                                         | 1. C6-7<br>2. Thoracic intramedullary | Both patients received surgical intervention                                  | <u>Survival for 1</u><br>24 months<br><br><u>Survival for 2</u><br>Not stated                                                 |
| Huelsman et al.           | Case Report<br>Level V  | N=1<br>Gender: Male<br>Age: 73 years                                                   | Inclusion: Patient with known systemic metastatic RCC presented with hematuria and osseous metastasis                                                                                                 | Thoracic and lumbar spine             | Sunitinib and radiation                                                       | <u>Survival</u><br>20 months<br><br>Diagnosis of spinal metastases occurred 19 months following diagnosis of primary.         |
| Salapura et al. (2014)    | Case Report<br>Level V  | N=1<br>Gender: Male<br>Age: 71 years                                                   | Inclusion: Patient with known papillary RCC Fuhrman Grade 3 presented with spine met                                                                                                                  | L1                                    | L1 treated with external beam radiation therapy (EBRT)                        | Still alive at 36 months following treatment of spine met                                                                     |
| Srinivasan et al. (2014)  | Case Report<br>Level V  | N=1<br>Gender: Male<br>Age: 40 years                                                   | Inclusion: patient presented with Cauda equina syndrome from metastatic RCC                                                                                                                           | L4-S2 intradural                      | Subtotal tumor excision followed by palliative RT, cisplatin, and irinotecan. | Gradual improvement in lower extremity strength but died during second cycle of chemotherapy (time not known).                |
| Aparici et al. (2016)     | Case Report<br>Level V  | N=1<br>Gender: Male<br>Age: 60 years                                                   | Inclusion: History of PRCC                                                                                                                                                                            | L1                                    | EBRT                                                                          | Still alive at 36 months following spine treatment<br><br><u>Time from diagnosis of primary to spine met</u><br>48 months     |
| Bai et al. (2014)         | Case Report<br>Level V  | N=1<br>Gender: Male<br>Age: 76 years                                                   | Inclusion: Decreased motor and sensation in lower extremities due to metastatic RCC                                                                                                                   | T6                                    | Decompressive surgical intervention without pre-operative embolization.       | Survival not reported<br><u>Time from diagnosis of primary to metastasis</u><br>12 months                                     |
| Ben et al. (2015)         | Case Report<br>Level V  | N=1<br>Gender: Male<br>Age: 44 years                                                   | Inclusion=Patient presented with back pain. Synchronous diagnosis of RCC was made                                                                                                                     | L1 and pelvis                         | Not stated                                                                    | Survival not stated<br>Diagnosis of spine disease and primary made at the same time (synchronous)                             |
| Bourlon et al. (2014)     | Case Report<br>Level V  | N=1<br>Gender: Female<br>Age: 71 years                                                 | Inclusion: Patient had known Fuhrman Grade 2 RCC                                                                                                                                                      | C1                                    | Surgical resection followed by IMRT and pazopanib.                            | Alive with stable disease 36 months after diagnosis of spine met. T<br><br><u>Time from primary to spine met</u><br>48 months |
| Heary et al. (2014)       | Case Report<br>Level V  | N=1<br>Gender: Male<br>Age: 54 years                                                   | Inclusion: Patient presented with bilateral LE weakness and diminished sensation. Synchronous diagnosis of metastatic RCC was made at the same surgical site of a previous meningioma (WHO I)removal. | T2-T4 intradural                      | Surgical resection of intradural RCC                                          | <u>Survival</u><br>12 months<br><br>Synchronous diagnosis of metastatic RCC                                                   |
| Hong et al. (2014)        | Case Report<br>Level V  | N=1<br>Gender=Male<br>Age=56 years                                                     | Inclusion: Patient with known Stage 3, Fuhrman Grade 2 RCC presented with spine metastasis.                                                                                                           | T3, L1, and L3                        | Palliative RT to thoracic and lumbar spine                                    | <u>Survival</u><br>3 months                                                                                                   |
| Norberg et al. (2014)     | Case Report<br>Level V  | N=1<br>Gender: Male<br>Age: 56 years                                                   | Inclusion: Patient presented with hematuria and back pain. Synchronous diagnosis of                                                                                                                   | T6, T8, T9, T11                       | Not treated; patient had rapid deterioration.                                 | <u>Survival</u><br>1 week after diagnosis of spine met                                                                        |

|                         |                                |                                                                                                                                                                                                      |                                                                                                                                          |                                         |                                                                                                                                                                                                                            |                                                                                                       |
|-------------------------|--------------------------------|------------------------------------------------------------------------------------------------------------------------------------------------------------------------------------------------------|------------------------------------------------------------------------------------------------------------------------------------------|-----------------------------------------|----------------------------------------------------------------------------------------------------------------------------------------------------------------------------------------------------------------------------|-------------------------------------------------------------------------------------------------------|
|                         |                                |                                                                                                                                                                                                      | metastatic RCC was made.                                                                                                                 |                                         |                                                                                                                                                                                                                            |                                                                                                       |
| Olaniran et al. (2014)  | Case Report<br><i>Level V</i>  | N=1<br>Gender: Female<br>Age: 20 years                                                                                                                                                               | Inclusion: Patient presented with back pain and LE weakness. Synchronous diagnosis of metastatic RCC was made.                           | L2, L3                                  | Oral sunitinib with targeted RT. This was followed by an IL-2 clinical trial.                                                                                                                                              | Survival not stated<br>Synchronous diagnosis.                                                         |
| Kato et al. (2013)      | Case Report<br><i>Level V</i>  | N=1<br>Gender: Male<br>Age: 60 years                                                                                                                                                                 | Inclusion: Patient with a synchronous diagnosis of Fuhrman Grade 2 metastatic RCC.                                                       | T12                                     | Surgical resection followed by post-operative RT and immunotherapy.                                                                                                                                                        | Synchronous diagnosis.<br>Survival not stated.                                                        |
| Strong et al. (2013)    | Case Series<br><i>Level IV</i> | N=2<br>1 Male, 72 years<br>1 Female, 49 years                                                                                                                                                        | Inclusion: 2 patients with metastatic RCC.                                                                                               | M: L4 intradural<br>F: L2               | Both patients had surgical resection of spine lesion.                                                                                                                                                                      | Both patients alive at 24 month follow-up.                                                            |
| Ji et al. (2013)        | Case Report<br><i>Level V</i>  | N=1<br>Gender: Male<br>Age: 68 years                                                                                                                                                                 | Inclusion: Patient with known RCC presented with lower back pain from spine met.                                                         | T12-L1 IDEM (intradural extramedullary) | Surgical resection of metastatic spine lesion.                                                                                                                                                                             | Still alive at 24-month follow up<br><u>Time from diagnosis of primary to spine met</u><br>192 months |
| Park et al. (2013)      | Case Report<br><i>Level V</i>  | N=1<br>Gender: Male<br>Age: 44 years                                                                                                                                                                 | Inclusion: Patient with known RCC presented with rapid progressive paraparesis, bowel/bladder incontinence, and LE numbness.             | T12 intramedullary                      | RT, sunitinib followed by surgical resection                                                                                                                                                                               | Alive at 6 month follow-up<br><u>Time from diagnosis of primary to spine met</u><br>6 months          |
| Clarençon et al. (2013) | Case Report<br><i>Level V</i>  | N=1<br>Gender=Male<br>Age=71 years                                                                                                                                                                   | Inclusion: patient presented with low back pain and LE paresthesias.                                                                     | Sacrum                                  | Pre-operative embolization with cryoablation and sacroplasty.                                                                                                                                                              | Survival not known                                                                                    |
| Dobson et al. (2013)    | Case Report<br><i>Level V</i>  | N=1<br>Gender=Femle<br>Age=81 years                                                                                                                                                                  | Inclusion: Patient presented with sciatica, fecal incontinence, and urinary retention. Diagnosis of synchronous metastatic RCC was made. | L2 intradural                           | Surgical resection with post-operative RT                                                                                                                                                                                  | Still alive at 36 months following spine treatment. Synchronous diagnosis of metastatic RCC.          |
| Quraishi et al. (2013)  | Case Series<br><i>Level IV</i> | Gender (N=6)<br>1. M<br>2. F<br>3. M<br>4. F<br>5. F<br>6. M<br>Age (years):<br>1. 68<br>2. 59<br>3. 66<br>4. 65<br>5. 45<br>6. 79<br>Frankel Grade:<br>1. D<br>2. D<br>3. D<br>4. E<br>5. C<br>6. E | Inclusion: All patients had metastatic RCC to the spine                                                                                  | Location of affected levels not stated. | All patients were surgically treated;<br>1. L5 decompression<br>2. L5-S1 decompression<br>3. L5-S2 decompression<br>4. L4-S1 corpectomy<br>5. L5 laminectomy/kyphoplasty, L3-iliac wing fixation<br>6. L5-S1 decompression | Survival:<br>1. 603 days<br>2. 581 days<br>3. 486 days<br>4. 171 days<br>5. 98- days<br>6. 150 days   |
| Azad et al. (2013)      | Case Report<br><i>Level V</i>  | N=1<br>Gender=Male<br>Age=60 years                                                                                                                                                                   | Inclusion: Patient with metastatic RCC to the spine                                                                                      | T9 and L4                               | Pazopanib and RT                                                                                                                                                                                                           | Alive at 5 months following spine treatment                                                           |
| Hennessey et al. (2013) | Case Report<br><i>Level V</i>  | N=1<br>Gender: Male, 21 years                                                                                                                                                                        | Inclusion: Patient presented with with back pain, LE weakness and hyper-reflexia. Synchronous diagnosis of metastatic mixed              | T12, L3, L4                             | Pre-operative embolization and surgical treatment at L4. Post-operative sunitinib.                                                                                                                                         | <u>Survival</u><br>8 months                                                                           |

|                          |                                          |                                                               |                                                                                                                                           |                                                                                                                                                                     |                                                                                                                                                                                                                                |                                                                                                                                                                                                      |
|--------------------------|------------------------------------------|---------------------------------------------------------------|-------------------------------------------------------------------------------------------------------------------------------------------|---------------------------------------------------------------------------------------------------------------------------------------------------------------------|--------------------------------------------------------------------------------------------------------------------------------------------------------------------------------------------------------------------------------|------------------------------------------------------------------------------------------------------------------------------------------------------------------------------------------------------|
|                          |                                          |                                                               | collecting duct RCC was made.                                                                                                             |                                                                                                                                                                     |                                                                                                                                                                                                                                |                                                                                                                                                                                                      |
| Inoue et al. (2013)      | Case Report<br><i>Level V</i>            | N=1<br>Gender=Male<br>Age=49 years                            | Inclusion: Patient presented with thoracic kyphosis and gait disturbances. Synchronous diagnosis of metastatic RCC was made.              | T11                                                                                                                                                                 | RT, sorafenib, sunitinib followed by surgical resection.                                                                                                                                                                       | Alive at 1 year follow-up<br><br>Synchronous diagnosis of metastatic RCC to the spine.                                                                                                               |
| Quraishi et al. (2013)   | Case Report<br><i>Level V</i>            | N=1<br>Gender: Male, 54 years                                 | Inclusion: Patient with neck and L arm pain, sensory loss, UE weakness, and hematuria. Synchronous diagnosis of metastatic RCC was made.  | C5-6 with spinal cord compression                                                                                                                                   | Pre-operative embolization followed by surgical resection.                                                                                                                                                                     | <u>Survival</u><br>12 months Synchronous diagnosis of metastatic RCC to the spine.                                                                                                                   |
| Yuasa et al. (2013)      | Case Report<br><i>Level V</i>            | N=1<br>Gender: Male, 65 years                                 | Inclusion: Patient with known RCC presented with bilateral LE paralysis.                                                                  | Thoracic (level not specified)                                                                                                                                      | RT to T5-8 followed by sunitinib and sorafenib                                                                                                                                                                                 | Alive 4 months following spine treatment.<br><br><u>Time from diagnosis of primary to spine met</u><br>2 months<br><br>Complete neurologic recovery.                                                 |
| Kim et al. (2009)        | Case Report<br><i>Level V</i>            | N=1<br>Gender: Male<br>Age: 41 years                          | Inclusion: Patient with known RCC presented with pain from spine metastasis.                                                              | L2 IDEM                                                                                                                                                             | Surgical resection                                                                                                                                                                                                             | Time from diagnosis of primary to spine met=12 months<br><br>Asymptomatic and alive at 12 month follow-up.                                                                                           |
| Donovan et al. ( )       | Case Report<br><i>Level V</i>            | N=1<br>Age: 41 years<br>Gender=Female                         | Inclusion: Patient presented with left-sided numbness with right-sided weakness. Synchronous diagnosis of metastatic RCC was made.        | C4 intramedullary                                                                                                                                                   | Surgical resection of spine lesion followed by RT for tumors in spine, ribs, skull, and femur.                                                                                                                                 | <u>Survival</u><br>2 months<br><br>Synchronous diagnosis of metastatic RCC.                                                                                                                          |
| Jackson et al. (2001)    | Retrospective Review<br><i>Level IV</i>  | N=79<br>Mean age: 55 years (16-82)<br><br>Gender= 63/79 (80%) | Inclusion: 79 patients with metastatic RCC to the spine were identified upon retrospective review at a single institution from 1993-1999. | 107 lesions:<br><br>O-C junction: 2<br>Cervical: 7<br>Cervicothoracic: 5<br>Thoracic: 40<br>Thoracolumbar: 19<br>Lumbar: 28<br>Lumbosacral junction: 2<br>Sacrum: 2 | All patients had surgical intervention.<br><br><u>Pre-operative Medical intervention</u><br>1. RT: 40/79 (51%)<br>2. And/or Chemotherapy/immunotherapy: 48/79 (61%)<br><br><u>Pre-operative embolization</u><br>47 operations. | <u>Median overall survival (N=79)</u><br>2.3 months<br><br><u>Mean overall survival (by Kaplan-Meier) (N=79)</u><br>12 months<br><br><u>Mean for those with known survival (N=57)</u><br>7.75 months |
| Sundaresan et al. (1986) | Retrospective Cohort<br><i>Level III</i> | N=43<br>Gender: 32/43 Male (74.4%)                            | Inclusion: Retrospective review identified 43 patients treated with metastatic RCC to the spine over a 7-year period.                     | Not stated                                                                                                                                                          | 32 patients were treated with surgical intervention.<br><br>11 patients were treated with RT                                                                                                                                   | Median survival for patients treated with surgery: 13 months (N=32)<br><br>Median survival for patients with RT alone: 3 months (N=11)                                                               |
| Sundaresan et al. (1990) | Retrospective Review<br><i>Level IV</i>  | N=30<br><br>Gender not known                                  | Inclusion: Retrospective over a 5-year period identified 30 patients surgically treated for metastatic RCC to the spine.                  | Not stated                                                                                                                                                          | All 30 patients were treated with surgery.<br><br>17/30 patients had surgery after failed RT.                                                                                                                                  | Median survival=16 months.<br><br>27/30 (90%) had neurologic improvement after surgery.                                                                                                              |
| King et al. (1991)       | Retrospective Review<br><i>Level IV</i>  | N=33<br>Gender= 18/30 Male (60%)                              | Inclusion: 33 patients with metastatic RCC to the spine were treated over a 5-year period.                                                | Cervical=8<br>Thoracic=6<br>Lumbar=19                                                                                                                               | All 33 patients were treated with decompressive surgery.                                                                                                                                                                       | <u>Mean overall survival (N=31)</u><br>8 months                                                                                                                                                      |

|                      |                                         |                                                                                                                |                                                                                                                            |                                  |                                                                               |                                                                                                                           |
|----------------------|-----------------------------------------|----------------------------------------------------------------------------------------------------------------|----------------------------------------------------------------------------------------------------------------------------|----------------------------------|-------------------------------------------------------------------------------|---------------------------------------------------------------------------------------------------------------------------|
|                      |                                         |                                                                                                                | 20/33 had neurologic dysfunction.                                                                                          |                                  |                                                                               | 2 still alive                                                                                                             |
| Tomita et al. (1994) | Case Series<br><i>Level V</i>           | Gender (N=4)<br>1. Female<br>2. Male<br>3. Male<br>4. Male<br>Age (years):<br>1. 67<br>2. 75<br>3. 52<br>4. 57 | Inclusion: 24 patients were included in this series. 4 had metastatic RCC to the spine.                                    | 1. L3<br>2. L3<br>3. L2<br>4. L4 | All 4 with metastatic RCC were treated with total en bloc spondylectomy (TES) | <u>Survival</u><br>1. Alive at 32 months<br>2. Alive at 16 months<br>3. Alive at 8 months<br>4. Alive at 6 months         |
| Sakaura et al.       | Retrospective review<br><i>Level IV</i> | N=3, all Male<br><u>Age (years)</u><br>1. 68<br>2. 65<br>3. 62                                                 | Inclusion: 12 patients underwent TES for metastatic spine lesions over a 6 year period. 2 had metastatic RCC to the spine. | 1. T11<br>2. L2<br>3. T6         | All patients were surgically treated with TES                                 | <u>Survival</u><br>1. 64 months<br>2. 16 months<br>3. Alive at 60 months                                                  |
| Giehl et al. (1999)  | Case Series<br><i>Level IV</i>          | N=11                                                                                                           | Inclusion: All 11 patients had metastatic RCC to the spine                                                                 | Not Stated                       | All patients were treated with surgical intervention                          | <u>Median overall survival</u><br>10 months for patients with multiple osseous lesions, several years for solitary lesion |

*Abbreviations:* RCC: Renal Cell Carcinoma; IDEM: Intradural extramedullary; SRS: Stereotactic radiosurgery; RT: Radiation therapy; KPS: Karnofsky Performance Status
